# Supplementary material
Source: PubMed Central journal article supplement (PMC4054214)
Supplement: AEM.00322-14_zam999105434so1.pdf [file AEM.00322-14_zam999105434so1.pdf]

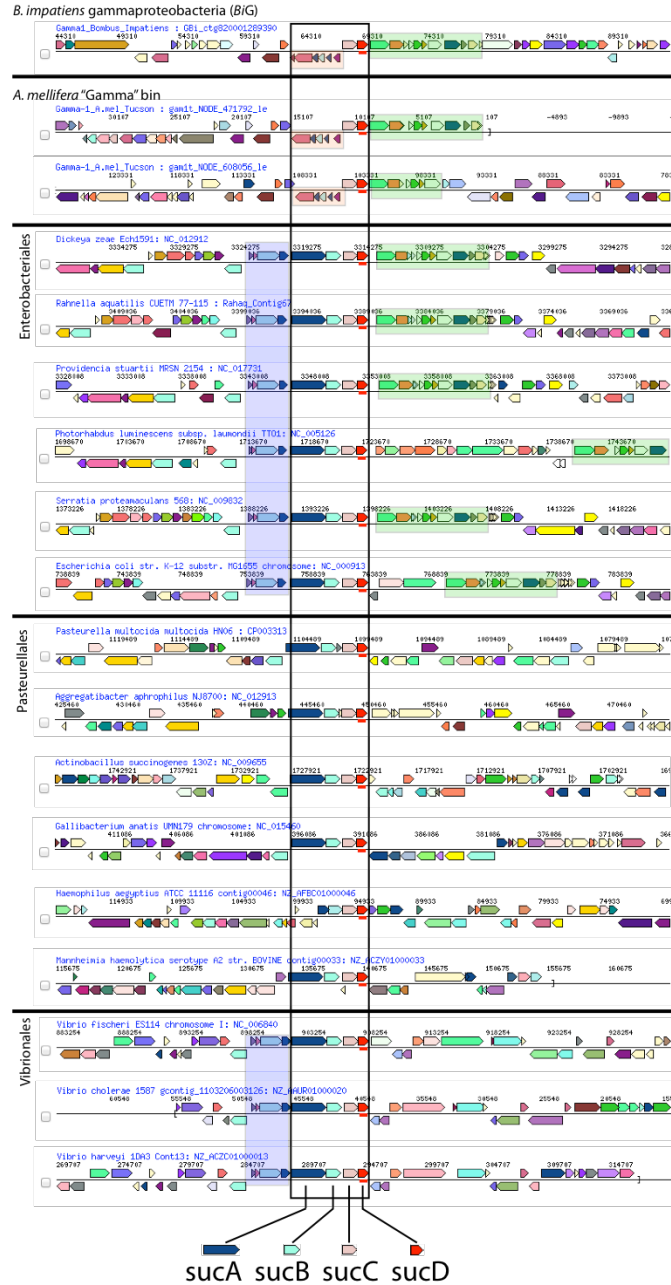

Figure S1. Example of the lack of genomic synteny between *BiG* and Orbales with Enterobacteriales and Pasteurellales displayed in the IMG/ER “Gene Cart: Gene Neighborhood” viewer. Shown is an alignment of genomic regions from bacteria that share the *sucD* gene, which is part of a conserved cluster of TCA cycle genes. The *sucABCD* operon region ( $\alpha$ -ketoglutarate dehydrogenase, succinyl-CoA synthetase) is boxed. The pink highlighted genes within the boxed area is a region of synteny unique to, and conserved among the Orbales, which includes *Gilliamella* (“Gamma” bin) and *BiG*. The *sdh* operon (succinate dehydrogenase) is highlighted in blue, which is syntenic among Enterobacteriales and Vibrionales adjacent to *sucABCD*, but absent in Orbales. Highlighted in green are the cytochrome bd complex operon (*cydAB*) and the Tol-Pal operon (*ybgC*, *tolQRAB*, *pal*, *ybgF*), which have a similar genomic location and gene order across *BiG*, the *A. mellifera* “Gamma” bin, and Enterobacteriales.

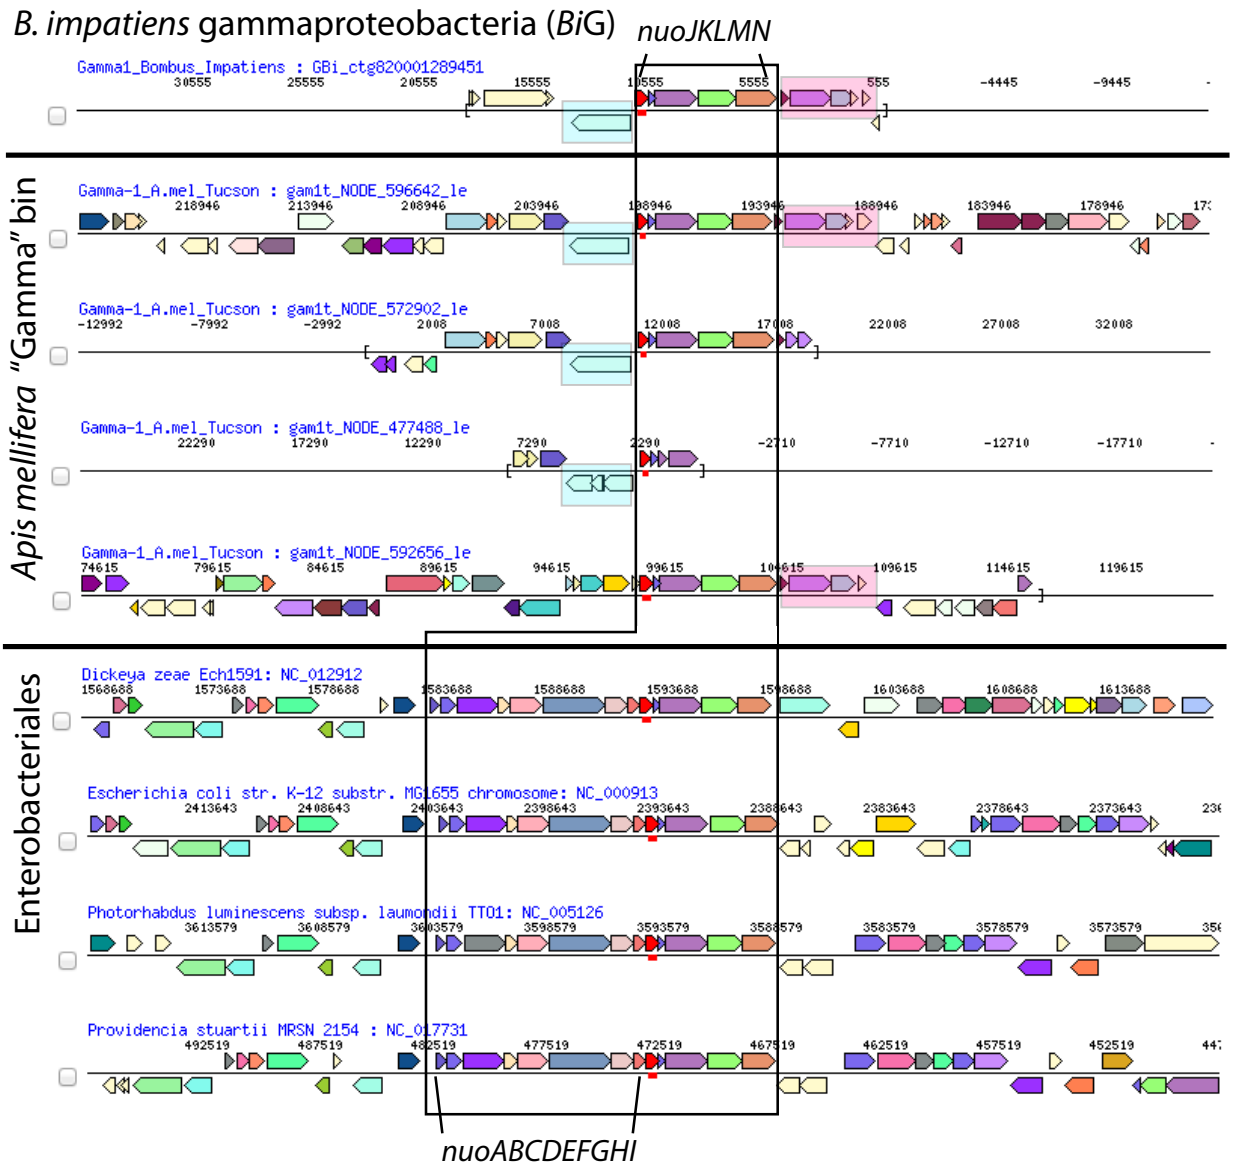

Figure S2. Alignment of the genomic regions from bacteria that harbor the *nuoJ* gene from the NADH dehydrogenase complex I operon (NDH-I, *nuoA-N*), the boxed region shows shared synteny of this operon. Unlike most Enterobacteriales, *BiG* and contigs from the *A. mellifera* "Gamma" bin do not contain genes *nuoA-I*. Similar to the region around *sucCD*, *BiG* and the "Gamma" bin have unique syntenic regions that are highlighted: in blue is a phosphoenolpyruvate carboxylase and in pink is *yajC*, *secD*, *secF*, and tRNA Ala (GGC).

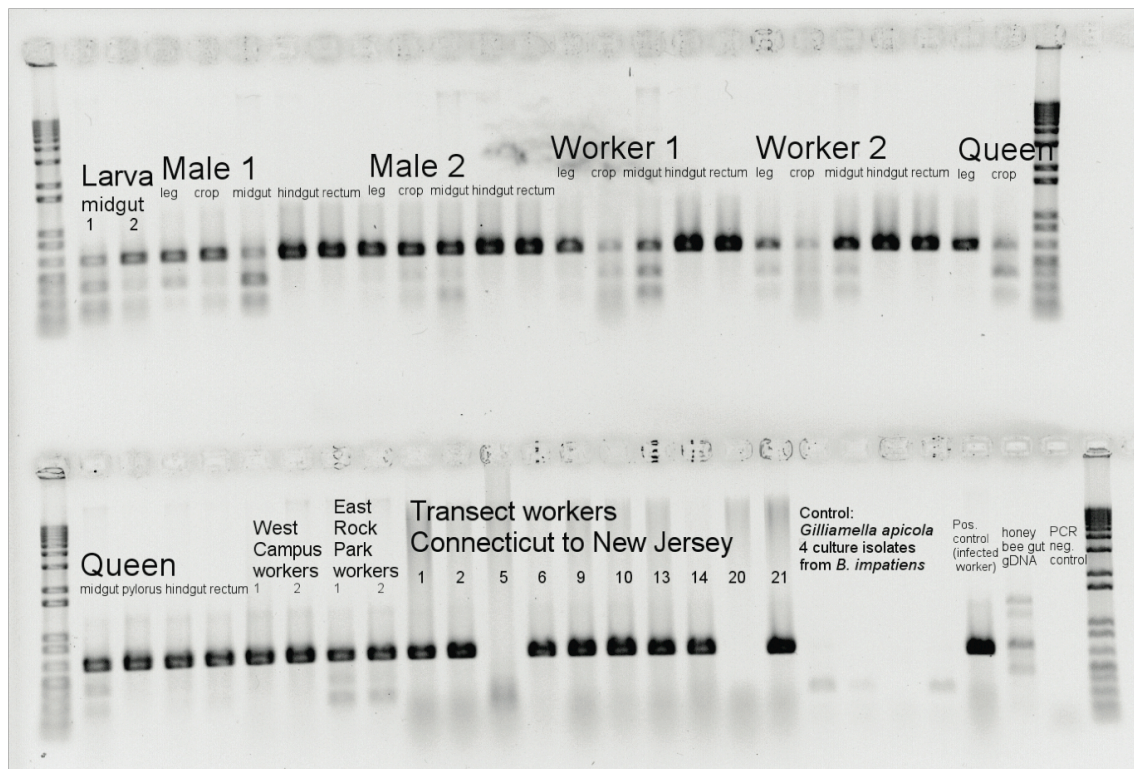

Figure S3. Image of gel showing the results of the survey for *Ca. Schmidhempelia bombi* with specific primers. Note that the primers did not amplify cultured isolates of *Gilliamella apicola*.

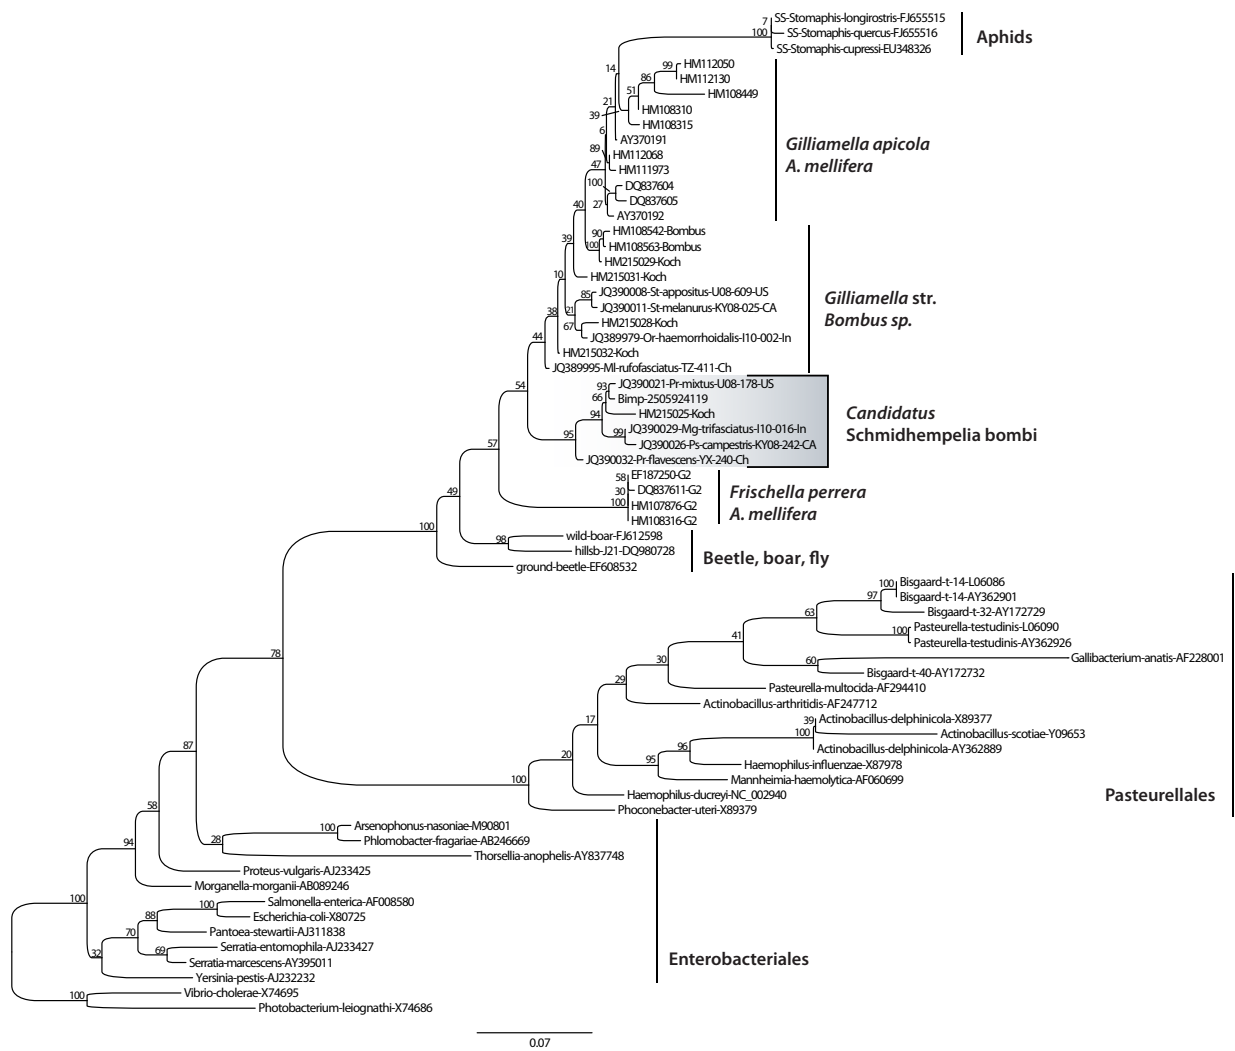

Figure S4. Full 16S rRNA gene maximum likelihood tree with sequences from Pasteurellales, Enterobacteriales, and the Orcales that includes *BiG* (RAxML, GTRGAMMA, 100 bootstrap replicates).

Table S1: COGs represented in the *BiG* genome and absent from the "Gamma" bin of the *A. mellifera* metagenome

| Gene Object ID | Locus Tag          | Length (aa) | COG Name                                                                | COG Number | BiG | "Gamma" Bin | AZ metagenome |
|----------------|--------------------|-------------|-------------------------------------------------------------------------|------------|-----|-------------|---------------|
| 2505924125     | GBi_0010.00000060  | 190         | Predicted esterase                                                      | COG3150    | 1   | 0           | 0             |
| 2505925004     | GBi_0051.00000020  | 173         | Predicted membrane protein                                              | COG4905    | 1   | 0           | 0             |
| 2505925071     | GBi_0053.00000040  | 269         | Predicted membrane protein                                              | COG4025    | 1   | 0           | 0             |
| 2505925088     | GBi_0054.00000120  | 264         | Predicted divalent heavy-metal cations transporter                      | COG0428    | 1   | 0           | 0             |
| 2505925174     | GBi_0059.00000130  | 476         | Na <sup>+</sup> /alanine symporter                                      | COG1115    | 1   | 0           | 0             |
| 2505925725     | GBi_0076.00000070  | 278         | Outer membrane phospholipase A                                          | COG2829    | 1   | 0           | 0             |
| 2505925792     | GBi_0078.00000036  | 133         | Predicted secreted protein                                              | COG5513    | 1   | 0           | 0             |
| 2505924217     | GBi_0012.00000210  | 251         | Uridine phosphorylase                                                   | COG2820    | 1   | 0           | 2             |
| 2505924310     | GBi_0016.00000470  | 145         | Predicted acyltransferase                                               | COG2153    | 1   | 0           | 12            |
| 2505924424     | GBi_0019.00000010  | 1082        | Nitrate reductase alpha subunit                                         | COG5013    | 1   | 0           | 25            |
| 2505924425     | GBi_0019.00000020  | 511         | Nitrate reductase beta subunit                                          | COG1140    | 1   | 0           | 16            |
| 2505924426     | GBi_0019.00000030  | 236         | Nitrate reductase delta subunit                                         | COG2180    | 1   | 0           | 9             |
| 2505924427     | GBi_0019.00000040  | 224         | Nitrate reductase gamma subunit                                         | COG2181    | 1   | 0           | 10            |
| 2505924446     | GBi_0019.00000230  | 207         | N-acyl-L-homoserine lactone synthetase                                  | COG3916    | 1   | 0           | 6             |
| 2505924498     | GBi_0022.00000010  | 248         | Lipoate-protein ligase A                                                | COG0095    | 1   | 0           | 9             |
| 2505924613     | GBi_0029.00000140  | 90          | Septum formation topological specificity factor                         | COG0851    | 1   | 0           | 3             |
| 2505924615     | GBi_0029.00000160  | 230         | Septum formation inhibitor                                              | COG0850    | 1   | 0           | 4             |
| 2505924622     | GBi_0029.00000230  | 170         | Tfp pilus assembly protein P1E                                          | COG4968    | 1   | 0           | 25            |
| 2505924725     | GBi_0034.00000020  | 91          | Antitoxin of toxin-antitoxin stability system                           | COG2161    | 1   | 0           | 5             |
| 2505924726     | GBi_0034.00000030  | 109         | Plasmid stabilization system protein                                    | COG3668    | 1   | 0           | 6             |
| 2505924800     | GBi_0038.00000036  | 241         | Tfp pilus assembly protein, ATPase P1M                                  | COG4972    | 1   | 0           | 12            |
| 2505924828     | GBi_0041.00000110  | 100         | Predicted methylated DNA-protein cysteine methyltransferase             | COG3695    | 1   | 0           | 1             |
| 2505925044     | GBi_0052.00000060  | 291         | Putative glucose uptake permease                                        | COG4975    | 1   | 0           | 2             |
| 2505925213     | GBi_0060.00000210  | 184         | Bacteroferritin (cytochrome b1)                                         | COG2193    | 1   | 0           | 13            |
| 2505925494     | GBi_0069.000000340 | 182         | Guanyl-specific ribonuclease Sa                                         | COG4290    | 1   | 0           | 1             |
| 2505925499     | GBi_0070.000000390 | 62          | Cobalamin-5-phosphate synthase                                          | COG0368    | 1   | 0           | 7             |
| 2505925563     | GBi_0070.000000550 | 376         | Predicted Fe-S oxidoreductases                                          | COG0535    | 1   | 0           | 13            |
| 2505925740     | GBi_0076.00000220  | 540         | Sigma54-dependent transcription regulator                               | COG4650    | 1   | 0           | 11            |
| 2505925743     | GBi_0076.00000250  | 251         | Predicted nucleotidyltransferase                                        | COG3541    | 2   | 0           | 6             |
| 2505925744     | GBi_0076.00000260  | 352         | Predicted nucleotidyltransferase                                        | COG3541    | "   | "           | "             |
| 2505925787     | GBi_0078.000000310 | 273         | D-aminopeptidase                                                        | COG2362    | 1   | 0           | 13            |
| 2505925795     | GBi_0078.000000390 | 337         | Protein involved in chromosome segregation, interacts with SMC proteins | COG5185    | 1   | 0           | 2             |
| 2505925826     | GBi_0079.000000270 | 128         | Cytidyltransferase                                                      | COG0615    | 1   | 0           | 5             |
| 2505925828     | GBi_0079.000000290 | 336         | Putative glycosyl/glycerophosphate transferases (TagF/TagB/EpsJ/RodC)   | COG1887    | 1   | 0           | 9             |
| 2505925832     | GBi_0079.000000330 | 476         | Mannose-1-phosphate guanylyltransferase                                 | COG0836    | 1   | 0           | 17            |

**Table S2: Location of VgrG genes in the *BiG* genome**

| Gene Object ID | Length | Locus Tag         | VgrG    | Adjacent gene lengths (aa)   | Adjacent region function                  |
|----------------|--------|-------------------|---------|------------------------------|-------------------------------------------|
| 2505925163     | 931    | GBi_0059.00000030 | intact  | 858                          | annexin repeat protein/insecticidal toxin |
| 2505924397     | 786    | GBi_0018.00000020 | intact  | 322, 1413, 219, 219          | unknown                                   |
| 2505924904     | 857    | GBi_0047.00000020 | intact  | contig break                 |                                           |
| 2505924238     | 249    | GBi_0014.00000010 | partial | 301, 1342, 274               | unknown                                   |
| 2505924237     | 330    | GBi_0013.00000150 | partial | contig break                 |                                           |
| 2505925888     | 228    | GBi_0084.00000080 | partial | 168, 111, 254, 239, 240, 241 | unknown                                   |
| 2505925852     | 241    | GBi_0081.00000010 | partial | 536, 246                     | unknown                                   |
| 2505925851     | 126    | GBi_0080.00000090 | partial | contig break                 |                                           |
| 2505925719     | 163    | GBi_0076.00000010 | partial | contig break                 |                                           |
| 2505925640     | 182    | GBi_0073.00000010 | partial | contig break                 |                                           |
| 2505925639     | 330    | GBi_0072.00000220 | partial | contig break                 |                                           |
| 2505925753     | 447    | GBi_0077.00000010 | partial | contig break                 |                                           |
| 2505925752     | 183    | GBi_0076.00000340 | partial | contig break                 |                                           |
| 2505925001     | 185    | GBi_0049.00000270 | partial | none                         |                                           |
| 2505924423     | 249    | GBi_0018.00000280 | partial | none                         |                                           |
| 2505925862     | 269    | GBi_0081.00000110 | partial | 229, 280, 212, 1222          | unknown                                   |
